# Supplementary material for: Nutrient-cycling mechanisms other than the direct absorption from soil may control forest structure and dynamics in poor Amazonian soils
Source: PubMed Central journal article supplement (PMC5362906; doi:10.1038/srep45017), 2017-03-23
Supplement: srep45017-s1.pdf [file srep45017-s1.pdf]

1  
2  
3  
4  
5  
6  
7  
8

**SUPPLEMENTARY INFORMATION OF THE ARTICLE: “NUTRIENT-CYCLING MECHANISMS OTHER THAN THE DIRECT ABSORPTION FROM SOIL MAY CONTROL FOREST STRUCTURE AND DYNAMICS IN POOR AMAZONIAN SOILS”**

Oriol Grau, Josep Peñuelas, Bruno Ferry, Vincent Freycon, Lilian Blanc, Mathilde Desprez, Christopher Baraloto, Jérôme Chave, Laurent Descroix, Aurélie Dourdain, Stephan Guitet, Ivan A. Janssens, Jordi Sardans, and Bruno Hérault

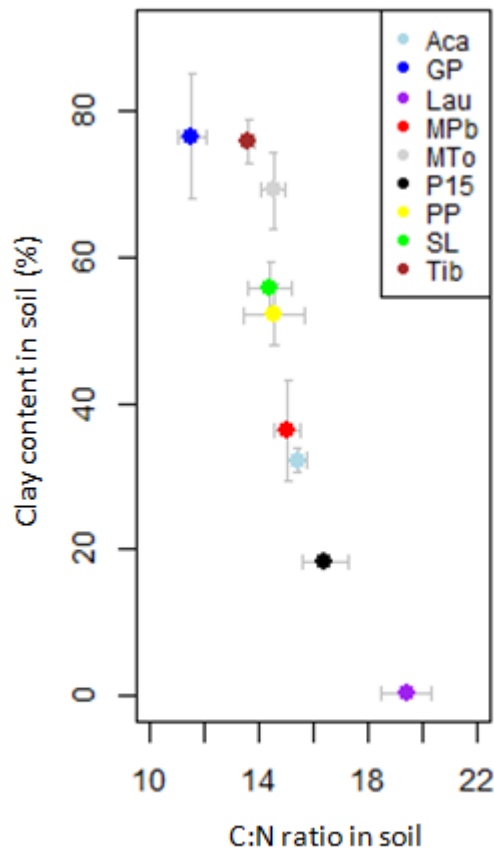

9  
10  
11  
12  
13  
14  
15  
16  
17

**Figure S1.** Clay content vs soil C:N ratio. Abbreviations in the legend are detailed in Table S1.

18  
19  
20  
21  
22  
23  
24  
25

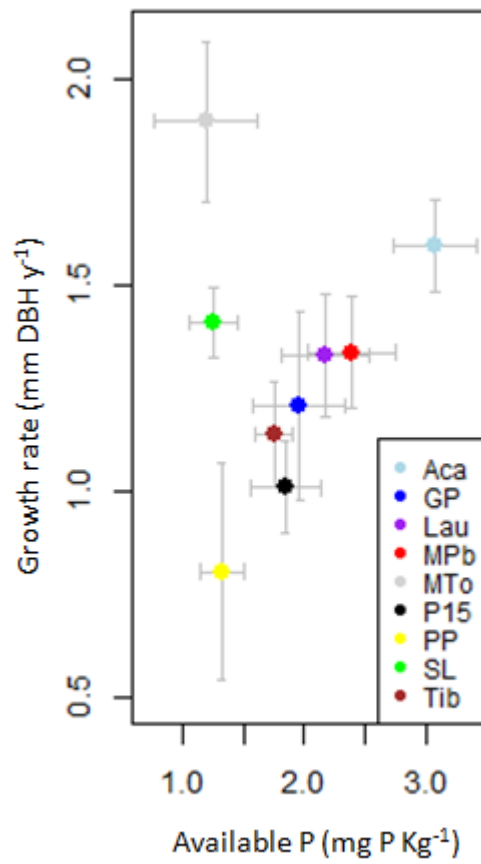

26  
27 **Figure S2.** Growth rate vs soil available P content. Abbreviations in the legend are detailed in Table  
28 S1.

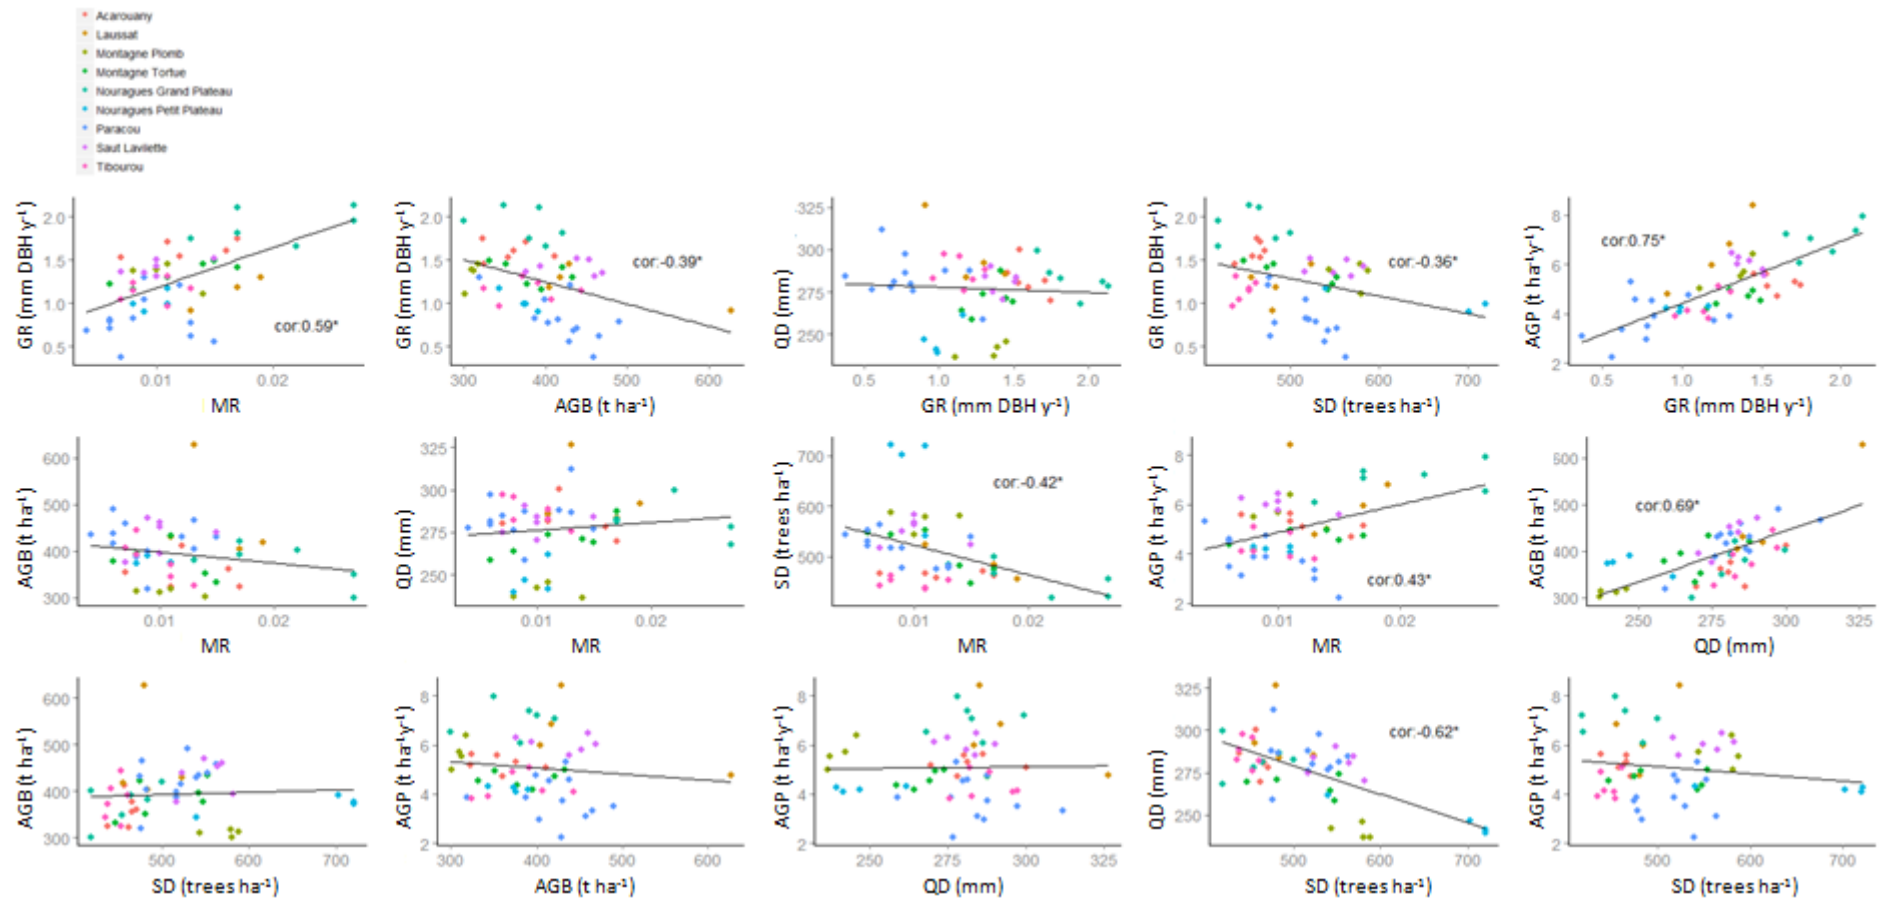

**Figure S3.** Correlations amongst forest-structure and forest-dynamic variables. 'cor' indicates the significant Pearson's product moment correlations (\*); AGB, Aboveground biomass; AGP, Aboveground woody productivity; GR, growth rate; MR, mortality rate; QD, quadratic diameter; SD, stem diameter.

**Table S1.** Characteristics of the study sites. The abbreviations of the study sites in the figures are also indicated.

| Site                         | Number of<br>monitored trees | Number of<br>1-ha plots | Latitude (°) | Longitude (°) | Elevation<br>(m) | Starting<br>year | Number of<br>censuses | Reference topography    | Geological<br>substrate | Soil type                | Mean annual<br>precipitation (mm) |
|------------------------------|------------------------------|-------------------------|--------------|---------------|------------------|------------------|-----------------------|-------------------------|-------------------------|--------------------------|-----------------------------------|
| Acarouany (Aca)              | 2957                         | 6                       | 5.543146     | -53.812982    | 49               | 2006             | 4                     | gentle slope (3-10%)    | Migmatites Caraibe      | Ferralsol                | 2800                              |
| Laussat (Lau)                | 2387                         | 4                       | 5.479167     | -53.596433    | 57               | 2009             | 2                     | plateau                 | White sand              | Arenosol                 | 2800                              |
| Montagne Plomb (MPb)         | 3301                         | 6                       | 5.006467     | -52.946968    | 114              | 2005             | 4                     | moderate slope (8-23%)  | Paramaca                | Ferralsol and Plinthosol | 3380                              |
| Montagne Tortue (MTo)        | 3401                         | 6                       | 4.217797     | -52.41255     | 160              | 2002             | 5                     | moderate slope (10-16%) | Paramaca                | Ferralsol                | 3930                              |
| Nouragues-Grand Plateau (GP) | 3069                         | 4                       | 4.085704     | -52.676461    | 125              | 2000**           | 3                     | moderate slope (10-20%) | Paramaca                | Ferralsol                | 2960                              |
| Nouragues-Petit Plateau (PP) | 7576                         | 12                      | 4.082899     | -52.683623    | 128              | 2000**           | 3                     | moderate slope (5-20%)  | Migmatites Caraibe      | Ferralsol                | 2960                              |
| Paracou (P15)                | 5036                         | 4*                      | 5.277326     | -52.927279    | 40               | 2001**           | 11                    | moderate slope (2-32%)  | Schist (Bonidoro)       | Acrisol                  | 2821                              |
| Saut Lavillette (SL)         | 3589                         | 6                       | 4.148613     | -52.20247     | 84               | 2003             | 3                     | plateau                 | Migmatites Caraibe      | Ferralsol                | 3930                              |
| Tibourou (Tib)               | 2818                         | 6                       | 4.398647     | -52.277666    | 77               | 2006             | 3                     | gentle slope (1-12%)    | Schist (Bonidoro)       | Ferralsol                | 3830                              |

\*Each plot at Paracou had an area of 1.56 ha. \*\*These plots had been monitored previously, but only the data collected after the year 2000 were used in order to standardise the census periods and methods of data collection amongst sites.

**Table S2.** Site-level means ( $\pm$ sd) of quadratic diameter, aboveground biomass, stem density, growth rate, mortality rate, and aboveground wood productivity.

| Site                      | Period    | Plot area (ha) | Quadratic diameter (mm) | Aboveground biomass ( $\text{t ha}^{-1}$ ) | Stem density (trees $\text{ha}^{-1}$ ) | Growth rate (mm DBH increase $\text{year}^{-1}$ ) | Mortality rate ( $\lambda_m$ ) | Aboveground wood productivity ( $\text{t ha}^{-1} \text{y}^{-1}$ ) |
|---------------------------|-----------|----------------|-------------------------|--------------------------------------------|----------------------------------------|---------------------------------------------------|--------------------------------|--------------------------------------------------------------------|
| Acarouany                 | 2006-2013 | 1              | 283 $\pm$ 10            | 358 $\pm$ 33                               | 460 $\pm$ 12                           | 1.597 $\pm$ 0.11                                  | 0.0123 $\pm$ 0.004             | 5.2 $\pm$ 0.34                                                     |
| Laussat                   | 2009-2013 | 1              | 240 $\pm$ 4             | 310 $\pm$ 7                                | 572 $\pm$ 20                           | 1.331 $\pm$ 0.15                                  | 0.0108 $\pm$ 0.003             | 5.6 $\pm$ 0.58                                                     |
| Montagne Plomb            | 2005-2013 | 1              | 271 $\pm$ 10            | 385 $\pm$ 40                               | 508 $\pm$ 46                           | 1.338 $\pm$ 0.13                                  | 0.0118 $\pm$ 0.004             | 4.622 $\pm$ 0.32                                                   |
| Montagne Tortue           | 2002-2013 | 1              | 283 $\pm$ 10            | 374 $\pm$ 43                               | 457 $\pm$ 33                           | 1.899 $\pm$ 0.19                                  | 0.0205 $\pm$ 0.006             | 7.020 $\pm$ 0.66                                                   |
| Nouragues (Grand Plateau) | 2000-2008 | 1              | 297 $\pm$ 20            | 470 $\pm$ 106                              | 486 $\pm$ 28                           | 1.210 $\pm$ 0.22                                  | 0.0150 $\pm$ 0.004             | 6.493 $\pm$ 1.52                                                   |
| Nouragues (Petit Plateau) | 2000-2008 | 1              | 284 $\pm$ 13            | 423 $\pm$ 44                               | 516 $\pm$ 31                           | 0.806 $\pm$ 0.26                                  | 0.0090 $\pm$ 0.003             | 3.814 $\pm$ 0.86                                                   |
| Paracou (P15)             | 2001-2014 | 1.56           | 247 $\pm$ 10            | 371 $\pm$ 20                               | 671 $\pm$ 88                           | 1.011 $\pm$ 0.11                                  | 0.0098 $\pm$ 0.006             | 4.210 $\pm$ 0.10                                                   |
| Saut Lavillette           | 2003-2012 | 0.99           | 281 $\pm$ 7             | 432 $\pm$ 38                               | 550 $\pm$ 26                           | 1.411 $\pm$ 0.08                                  | 0.0102 $\pm$ 0.003             | 6.040 $\pm$ 0.32                                                   |
| Tibourou                  | 2006-2012 | 1              | 287 $\pm$ 8             | 380 $\pm$ 43                               | 447 $\pm$ 10                           | 1.140 $\pm$ 0.13                                  | 0.0096 $\pm$ 0.002             | 4.317 $\pm$ 0.54                                                   |

**Table S3.** Site-level means of soil and litter chemical characteristics.

| Site                    | Soil        |             |                                    |                                |               |          |               |                 |               |                 |                                |                               |                               |                              |                               |                               |                               | Litter |               |             |             |                                |                             |                                  |                           |                          |                           |       |       |
|-------------------------|-------------|-------------|------------------------------------|--------------------------------|---------------|----------|---------------|-----------------|---------------|-----------------|--------------------------------|-------------------------------|-------------------------------|------------------------------|-------------------------------|-------------------------------|-------------------------------|--------|---------------|-------------|-------------|--------------------------------|-----------------------------|----------------------------------|---------------------------|--------------------------|---------------------------|-------|-------|
|                         | Total C (%) | Total N (%) | Available P (mg Kg <sup>-1</sup> ) | Total P (mg Kg <sup>-1</sup> ) | pH (in water) | Clay (%) | Fine silt (%) | Coarse silt (%) | Fine sand (%) | Coarse sand (%) | CEC (meq 100 g <sup>-1</sup> ) | Ca (meq 100 g <sup>-1</sup> ) | Mg (meq 100 g <sup>-1</sup> ) | K (meq 100 g <sup>-1</sup> ) | Na (meq 100 g <sup>-1</sup> ) | Al (meq 100 g <sup>-1</sup> ) | Mn (meq 100 g <sup>-1</sup> ) | C:N    | N:available P | Total C (%) | Total N (%) | Total P (mg Kg <sup>-1</sup> ) | Ash ((mg Kg <sup>-1</sup> ) | Total Ca ((mg Kg <sup>-1</sup> ) | Mg (mg Kg <sup>-1</sup> ) | K (mg Kg <sup>-1</sup> ) | Na (mg Kg <sup>-1</sup> ) | C:N   | N:P   |
| Acarouany               | 2.10        | 0.14        | 3.08                               | 171.60                         | 4.45          | 32.18    | 2.12          | 0.90            | 10.80         | 53.96           | 2.04                           | 0.35                          | 0.19                          | 0.06                         | 0.14                          | 0.98                          | 0.00                          | 15.39  | 451           | 48.61       | 1.85        | 478                            | 6566                        | 6.596                            | 2.910                     | 2.938                    | 1.518                     | 26.35 | 38.78 |
| Laussat                 | 1.34        | 0.07        | 2.17                               | 30.60                          | 4.50          | 0.44     | 0.42          | 0.62            | 3.48          | 95.06           | 1.23                           | 0.41                          | 0.22                          | 0.04                         | 0.05                          | 0.02                          | 0.01                          | 19.40  | 331           | 51.13       | 1.07        | 162                            | 5476                        | 13.796                           | 2.534                     | 1.240                    | 616                       | 47.89 | 67.52 |
| Montagne Plomb          | 6.43        | 0.43        | 2.39                               | 592.20                         | 4.74          | 36.34    | 27.34         | 3.60            | 9.46          | 23.30           | 5.39                           | 0.91                          | 0.45                          | 0.19                         | 0.14                          | 2.00                          | 0.02                          | 15.05  | 1816          | 51.74       | 1.15        | 164                            | 4396                        | 13000                            | 2.004                     | 1.482                    | 846                       | 45.20 | 70.88 |
| Montagne Tortue         | 3.82        | 0.26        | 1.19                               | 553.6                          | 4.31          | 69.16    | 9.30          | 3.96            | 4.50          | 13.14           | 2.59                           | 0.22                          | 0.23                          | 0.09                         | 0.12                          | 1.56                          | 0.03                          | 14.52  | 2471          | 51.54       | 1.56        | 228                            | 6448                        | 10312                            | 2.360                     | 1.950                    | 954                       | 32.99 | 69.87 |
| Nouragues-Grand Plateau | 2.71        | 0.23        | 1.96                               | 560.60                         | 4.85          | 76.42    | 8.42          | 2.14            | 3.00          | 10.04           | 3.10                           | 0.61                          | 0.41                          | 0.08                         | 0.07                          | 0.60                          | 0.34                          | 11.54  | 1230          | 49.84       | 1.55        | 322                            | 8056                        | 13644                            | 2.766                     | 1.916                    | 722                       | 32.20 | 48.74 |
| Nouragues-Petit Plateau | 2.33        | 0.16        | 1.32                               | 114.00                         | 4.49          | 52.06    | 3.02          | 1.50            | 7.28          | 36.12           | 2.75                           | 0.09                          | 0.18                          | 0.06                         | 0.07                          | 1.56                          | 0.01                          | 14.55  | 1227          | 51.04       | 1.26        | 196                            | 5088                        | 6458                             | 2.248                     | 1.752                    | 978                       | 40.40 | 65.52 |
| Paracou (P15)           | 2.10        | 0.13        | 1.85                               | 104.00                         | 4.81          | 18.35    | 4.35          | 2.88            | 27.87         | 46.58           | 1.12                           | 0.21                          | 0.26                          | 0.08                         | 0.11                          | 0.43                          | 0.00                          | 16.42  | 701           | 50.82       | 1.31        | 178.6                          | 8760                        | 5950                             | 2.764                     | 1.010.2                  | 595                       | 39.07 | 74.59 |
| Saut Lavillette         | 3.07        | 0.21        | 1.25                               | 158.40                         | 4.33          | 55.78    | 14.10         | 1.22            | 4.12          | 24.84           | 2.33                           | 0.12                          | 0.18                          | 0.07                         | 0.09                          | 1.56                          | 0.01                          | 14.39  | 1743          | 53.48       | 1.34        | 188                            | 4252                        | 6326                             | 2.324                     | 2.052                    | 1.320                     | 40.16 | 71.18 |
| Tibourou                | 4.25        | 0.31        | 1.75                               | 272.80                         | 4.38          | 75.82    | 6.64          | 2.62            | 6.44          | 8.50            | 3.13                           | 0.25                          | 0.27                          | 0.09                         | 0.09                          | 1.74                          | 0.01                          | 13.61  | 1786          | 51.45       | 1.61        | 282                            | 4180                        | 8344                             | 2.550                     | 1.654                    | 794                       | 32.33 | 57.68 |

**Table S4.** Selected predictors in the mixed models. The significant predictors are in bold type.

| Variable                             | $R^2$ (fixed factors) | Selected predictors                 | Estimates     | $p$                 |
|--------------------------------------|-----------------------|-------------------------------------|---------------|---------------------|
| <b>Quadratic diameter</b>            | 0.63                  | Intercept                           | 277.137       |                     |
|                                      |                       | <b>Soil C:N</b>                     | <b>-12.13</b> | <b>0.0003 (***)</b> |
|                                      |                       | <b>Litter K content<sup>a</sup></b> | <b>5.33</b>   | <b>0.0175 (*)</b>   |
| <b>Aboveground biomass</b>           | 0.89                  | Intercept                           | 392.427       |                     |
|                                      |                       | <b>Soil C:N</b>                     | <b>-31.97</b> | <b>0.0039 (**)</b>  |
| <b>Stem density</b>                  | 0.69                  | Intercept                           | 514.658       |                     |
|                                      |                       | <b>Litter N:P</b>                   | <b>35.43</b>  | <b>0.0041 (**)</b>  |
|                                      |                       | <b>Total soil P<sup>b</sup></b>     | <b>-41.50</b> | <b>0.0026 (**)</b>  |
|                                      |                       | <b>Soil pH</b>                      | <b>37.54</b>  | <b>0.0034 (**)</b>  |
| <b>Growth rate</b>                   | -                     | None                                | -             | -                   |
| <b>Mortality rate</b>                | -                     | None                                | -             | -                   |
| <b>Aboveground wood productivity</b> | -                     | None                                | -             | -                   |

<sup>a</sup>Litter N and P contents were also significant predictors but were highly correlated with litter K content, so only one was included in the final models; we chose litter K content because it increased model robustness. <sup>b</sup>Total N and K contents in the soil were also significant predictors but were highly correlated with soil total P content, so only one was included in the final models; we chose soil total P content because it increased model robustness. No significant predictors were selected for growth rate, mortality rate, or aboveground wood productivity. \*\*\*,  $p < 0.0005$ ; \*\*,  $p < 0.005$ ; \*,  $p < 0.05$ .





**Table S6.** Correlation coefficients for the modelled variables (\*indicates significant correlation).

|                                      | <b>Quadratic diameter</b> | <b>Aboveground biomass</b> | <b>Stem density</b> | <b>Growth rate</b> | <b>Mortality rate</b> | <b>Aboveground wood productivity</b> |
|--------------------------------------|---------------------------|----------------------------|---------------------|--------------------|-----------------------|--------------------------------------|
| <b>Quadratic diameter</b>            | 1                         | 0.689*                     | -0.624*             | -0.065             | 0.121                 | 0.019                                |
| <b>Aboveground biomass</b>           | 0.689*                    | 1                          | 0.059               | -0.392*            | -0.197                | -0.114                               |
| <b>Stem density</b>                  | -0.624*                   | 0.059                      | 1                   | -0.364*            | -0.418*               | -0.154                               |
| <b>Growth rate</b>                   | -0.065                    | -0.392*                    | 0.364*              | 1                  | 0.594*                | 0.749*                               |
| <b>Mortality rate</b>                | 0.121                     | -0.197                     | -0.418*             | 0.594*             | 1                     | 0.428*                               |
| <b>Aboveground wood productivity</b> | 0.019                     | -0.114                     | -0.154              | 0.749*             | 0.428*                | 1                                    |
